# Supplementary material for: Gender Disparities in Stroke Risk Profiles: A Single Centre Observational Study
Source: Research Square preprint supplement (doi:10.21203/rs.3.rs-7499935/v1), 2025-10-22
Supplement: Supplementary file 1 [file 07f584d8b3443481fa8b4c78.docx]

STROBE Statement—checklist of items that should be included in reports of observational studies

|  | Item No. | Recommendation | Page  No. | Relevant text from manuscript |
| --- | --- | --- | --- | --- |
| **Title and abstract** | 1 | (*a*) Indicate the study’s design with a commonly used term in the title or the abstract | 1 |  |
| (*b*) Provide in the abstract an informative and balanced summary of what was done and what was found | 2 | Abstract Section |
| Introduction | | | |  |
| Background/rationale | 2 | Explain the scientific background and rationale for the investigation being reported | 3 | Introduction Section |
| Objectives | 3 | State specific objectives, including any prespecified hypotheses | 3 | This study aims to compare the risk factor profiles in male and female stroke patients and evaluate gender differences in time-to-presentation at a private tertiary care hospital in Pakistan. |
| Methods | | | |  |
| Study design | 4 | Present key elements of study design early in the paper | 3-4 | “This retrospective, cross-sectional, observational study was conducted at the Aga Khan University Hospital from January 2016 to December 2018.” |
| Setting | 5 | Describe the setting, locations, and relevant dates, including periods of recruitment, exposure, follow-up, and data collection | 3-4 | “…Aga Khan University Hospital from January 2016 to December 2018.” |
| Participants | 6 | (*a*) *Cohort study*—Give the eligibility criteria, and the sources and methods of selection of participants. Describe methods of follow-up  *Case-control study*—Give the eligibility criteria, and the sources and methods of case ascertainment and control selection. Give the rationale for the choice of cases and controls  *Cross-sectional study*—Give the eligibility criteria, and the sources and methods of selection of participants | N/A  N/A  3-4 | “Patients diagnosed with ischemic or hemorrhagic stroke were included, while those with traumatic brain injuries, subarachnoid hemorrhage, those who left against medical advice, or those who declined physician-recommended treatment were excluded.” |
| (*b*)*Cohort study*—For matched studies, give matching criteria and number of exposed and unexposed  *Case-control study*—For matched studies, give matching criteria and the number of controls per case | N/A |  |
| Variables | 7 | Clearly define all outcomes, exposures, predictors, potential confounders, and effect modifiers. Give diagnostic criteria, if applicable | 3-4 | “Data collected included demographics, clinical characteristics, vascular risk factors, and treatment details (including administration of intravenous tPA).” |
| Data sources/ measurement | 8* | For each variable of interest, give sources of data and details of methods of assessment (measurement). Describe comparability of assessment methods if there is more than one group | 3-4 | “Clinical and radiological data were collected and recorded in Microsoft Excel in accordance with hospital policy.” |
| Bias | 9 | Describe any efforts to address potential sources of bias | 3-4 | “To maintain confidentiality, all participants were assigned unique study codes, and the dataset was de-identified. Access to the data was restricted to the principal investigator and subsequently shared with the statistician for analysis.” |
| Study size | 10 | Explain how the study size was arrived at | N/A |  |

Continued on next page

| Quantitative variables | 11 | Explain how quantitative variables were handled in the analyses. If applicable, describe which groupings were chosen and why | 3-4 | “Means and standard deviations were computed for continuous variables, whereas frequencies and percentages were computed for categorical variables. Comparative analysis was conducted using t-test for continuous variables and chi-squared test for categorical variables. P-values <0.05 were considered significant.” |
| --- | --- | --- | --- | --- |
| Statistical methods | 12 | (*a*) Describe all statistical methods, including those used to control for confounding | 3-4 | “STATA version 17 was used for statistical analysis. Means and standard deviations were computed for continuous variables, whereas frequencies and percentages were computed for categorical variables. Comparative analysis was conducted using t-test for continuous variables and chi-squared test for categorical variables. P-values <0.05 were considered significant.” |
| (*b*) Describe any methods used to examine subgroups and interactions | N/A |  |
| (*c*) Explain how missing data were addressed | N/A |  |
| (*d*) *Cohort study*—If applicable, explain how loss to follow-up was addressed  *Case-control study*—If applicable, explain how matching of cases and controls was addressed  *Cross-sectional study*—If applicable, describe analytical methods taking account of sampling strategy | N/A |  |
| (*e*) Describe any sensitivity analyses | N/A |  |
| Results | | | | |
| Participants | 13* | (a) Report numbers of individuals at each stage of study—eg numbers potentially eligible, examined for eligibility, confirmed eligible, included in the study, completing follow-up, and analysed | 4-5 | “A total of 1,074 patients were included in the registry…” |
| (b) Give reasons for non-participation at each stage | N/A |  |
| (c) Consider use of a flow diagram | N/A |  |
| Descriptive data | 14* | (a) Give characteristics of study participants (eg demographic, clinical, social) and information on exposures and potential confounders | 4-5 | “674 males (62.7%) and 400 females (37.2%)… mean age… comorbidities… Table 1.” |
| (b) Indicate number of participants with missing data for each variable of interest | 4-5 | “Among 953 patients with documented time of stroke onset and presentation…” |
| (c) *Cohort study*—Summarise follow-up time (eg, average and total amount) | N/A |  |
| Outcome data | 15* | *Cohort study*—Report numbers of outcome events or summary measures over time | N/A |  |
| *Case-control study—*Report numbers in each exposure category, or summary measures of exposure | *N/A* |  |
| *Cross-sectional study—*Report numbers of outcome events or summary measures | 4-5 | “Stroke severity at admission… thrombolysis rates… mRS at discharge…” |
| Main results | 16 | (*a*) Give unadjusted estimates and, if applicable, confounder-adjusted estimates and their precision (eg, 95% confidence interval). Make clear which confounders were adjusted for and why they were included | 4-5 | “Atrial fibrillation was more prevalent in females (15.0%) than in males (7.3%) (*p*<0.001, OR = 0.45). Smoking was significantly more common among males (20.6%) compared to females (3.0%) (*p*<0.001, OR = 8.38). Similar differences were observed for ex-smokers (OR = 4.23) and TIA history (OR = 0.59). Valvular heart disease was more frequent in females (5.5% vs. 2.8%, OR = 0.50, *p*=0.027). Time-to-presentation showed no significant sex difference (ORs 0.91–1.16, *p*=0.788). Thrombolysis rates were comparable (OR = 1.82, *p*=0.218). No significant difference was found in discharge mRS (2.27 vs. 2.45, *p*=0.178).” |
| (*b*) Report category boundaries when continuous variables were categorized | N/A |  |
| (*c*) If relevant, consider translating estimates of relative risk into absolute risk for a meaningful time period | N/A |  |

Continued on next page

| Other analyses | 17 | Report other analyses done—eg analyses of subgroups and interactions, and sensitivity analyses | N/A |  |
| --- | --- | --- | --- | --- |
| Discussion | | | | |
| Key results | 18 | Summarise key results with reference to study objectives | 5-7 | “Our study presents several clinically relevant findings….” |
| Limitations | 19 | Discuss limitations of the study, taking into account sources of potential bias or imprecision. Discuss both direction and magnitude of any potential bias | 8 | “Our study poses several limitations…” |
| Interpretation | 20 | Give a cautious overall interpretation of results considering objectives, limitations, multiplicity of analyses, results from similar studies, and other relevant evidence | 5-8 | “This metric is consistent with findings in the current literature… A recent meta-analysis… A study conducted in 2020 reported… These findings are in line with prior reports… While the difference in smoking was highly significant… Studies have demonstrated that men carry a greater atherosclerotic burden… In contrast to the above literature, our study found no significant gender differences… These findings are not only in line with global literature but also with the trends of gender disparity in Pakistan.” |
| Generalisability | 21 | Discuss the generalisability (external validity) of the study results | 5-8 | “The single-center design could limit the generalizability of our results to the broader Pakistani demographic, as awareness, access to healthcare, and treatment guidelines can differ significantly across regions…” |
| Other information | |  | | |
| Funding | 22 | Give the source of funding and the role of the funders for the present study and, if applicable, for the original study on which the present article is based | 1 | Funding  None. |

*Give information separately for cases and controls in case-control studies and, if applicable, for exposed and unexposed groups in cohort and cross-sectional studies.

**Note:** An Explanation and Elaboration article discusses each checklist item and gives methodological background and published examples of transparent reporting. The STROBE checklist is best used in conjunction with this article (freely available on the Web sites of PLoS Medicine at http://www.plosmedicine.org/, Annals of Internal Medicine at http://www.annals.org/, and Epidemiology at http://www.epidem.com/). Information on the STROBE Initiative is available at www.strobe-statement.org.
